# Supplementary material for: Evaluating post-wildfire debris-flow rainfall thresholds and volume models at the 2020 Grizzly Creek Fire in Glenwood Canyon, Colorado, USA
Source: Copernicus journal article supplement (doi:10.5194/nhess-24-2093-2024), 2024-06-28
Supplement: Supplementary file 2 [file nhess-24-2093-2024-supplement.zip]

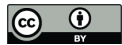

*Supplement of*

**Evaluating post-wildfire debris-flow rainfall thresholds and volume models at the 2020 Grizzly Creek Fire in Glenwood Canyon, Colorado, USA**

**Francis K. Rengers et al.**

*Correspondence to:* Francis K. Rengers (frengers@usgs.gov)

- nhess-24-2093-2024-supplement-title-page.pdf
- Supplemental Figures\_revised\_v1\_clean.pdf
- Supplementary\_video.mp4

The copyright of individual parts of the supplement might differ from the article licence.
